# Supplementary material for: Adverse Neonatal Outcomes and Its Associated Factors Among Mothers with Short and Recommended Interpregnancy Interval, in Awi Zone Public Hospitals, 2020.
Source: Research Square preprint supplement (doi:10.21203/rs.3.rs-146927/v1), 2021-01-18
Supplement: Supplementary file 1 [file 886257aec366a34e4a9f561b.docx]

**English version questionnaire**

**Part-I socio demographic data collection questionnaire**

| Ser. No | Questions | Answers | Code | | Skip to |
| --- | --- | --- | --- | --- | --- |
|  | How old are you? |  |  | |  |
|  | Marital status? | Married  single  widowed  divorced | 1  2  3  4 | |  |
|  | What is your religion? | Orthodox  Muslim  Others | 1  2  3 | |  |
|  | Ethnicity | Amhara  Oromo  Tigre  Others | 1  2  3  4 | |  |
|  | Educational status | Not attending formal education  Primary (1-8)  Secondary (9-12)  College and above | 1  2  3  4 | |  |
|  | What is your occupation? | Farmer  Employ  House wife  Merchant | 1  2  3  4 | |  |
|  | Residence | Rural  Urban | 0  1 | |  |
|  | Husband’s educational level? | Not attending formal education  Primary (1-8)  Secondary (9-12)  College and above | 1  2  3  4 | |  |
|  | What is your husband’s occupation? | Farmer  Daily laborer  Employ  Merchant | 1  2  3  4 | |  |
| **Part-II obstetric and pregnancy interval data collection questionnaire** | | | | | |
|  | How many times you get pregnant? | Once  More than once | | 1…  2 | Skip to-107 |
|  | Do you have any history of abortion? | Yes  No | | 1  0 |  |
|  | Do you have any live born? | Yes  No | | 1  0… | Skip to-108 |
|  | How many live births you had? |  | |  |  |
|  | Was your index child born alive? | Yes  No | | 1  0… | Skip to 109 |
|  | What was mode of delivery for the index? | C/s  SVD  instrumental | | 1  2  3 |  |
|  | What was Your age when u gave birth of the index child? |  | |  |  |
|  | Was your index child born preterm? | Yes  No | | 1  0 |  |
|  | Was it low birth weight? | Yes  No | | 1  0 |  |
|  | How long did you breast feed? |  | |  |  |
|  | Have you ever used family planning method after your index child? | Yes  No | | 1....  0 | 11 |
|  | Was the current pregnancy planned? | Yes  No | | 1….  0 | Skip to 114 |
|  | Why not you use birth control method? | Thought I don’t get pregnant  Husband don’t allow to use  Side effect of the method  Method failure | | 1  2  3  4 |  |
|  | Do you know your LNMP? | Yes  No | | 1  0 |  |
|  | Do you remember quickening date? | Yes  No | | 1  0 |  |
|  | Do you have u/s scan of below 20 weeks? | Yes  No | | 1  0 |  |
|  | Was the GA known? | Yes  No | | 1  0 |  |
|  | What is your GA? |  | |  |  |
|  | How old is your index child? |  | |  |  |
|  | How long is the interpregnancy interval? |  | |  |  |
|  | Did you have ANC follow up? | Yes  No | | 1  0…. | Skip to-120 |
|  | At what month did you start? |  | |  |  |
|  | Did you take TT vaccine? | Yes  No | | 1  0… | Skip to-117 |
|  | How many times? |  | |  |  |
|  | Were you supplemented with Fefol? | Yes  No | | 1  0 |  |
|  | Had you taken it all? | Yes  No | | 1....  0 | 12 |
|  | Why not? | Not comfortable  I thought has no benefit | | 1  0 |  |
|  | How many meals per day you used to eat? |  | |  |  |
|  | How many ANC visits? |  | |  |  |
|  | Any complication during this pregnancy? | Yes  No | | 1  0 |  |
|  | What complication? | PIH  Anemia  Gestational DM  APH  Others | | 1  2  3  4  5 |  |
|  | Did you smoke cigarate while pregnant? | Yes  No | | 1  0 |  |
|  | How many packet per day? |  | |  |  |
|  | Did you chew khat? | Yes  No | | 1  0 |  |
|  | Is your GA known? | Yes  No | |  |  |
|  | What is the GA in weeks? |  | |  |  |
|  | From what? | LNMP  Quickening  <20 wks. u/s | | 1  2  3 |  |
|  | How old is your index child? |  | |  |  |
|  | Does labor start spontaneously? | Yes  No | | 1  0 |  |
|  | How long the labor stays? |  | |  |  |
|  | Was it augmented? |  | |  |  |
|  | For how long membrane ruptures? |  | |  |  |
|  | Fetal presentation? | Vertex  Face  Brow  shoulder  Breech | | 1  2  3  4  5 |  |
|  | Mode of delivery? | SVD  C/S  Instrumental | | 1....  2  3 | 147 |
|  | What was the indication for c/s? | Obstructed labor  NRFHRP  Malpresentation  Failed induction  Previous c/s scar  Others | | 1  2  3  4  5  6 |  |
|  | Professional who conduct delivery | Midwife  Nurse  HO and above | | 1  2  3 |  |
| Part III: Questions related to neonatal outcome | | | | | |
|  | Was there meconium? | Yes  No | 1  0 | |  |
|  | Grade | G1  G2  G3 | 1  2  3 | |  |
|  | Was it resuscitated? | Yes  No | 1  0 | |  |
|  | Was it born alive? | Yes  No | 1  0 | | Skip to 208 |
|  | Condition of new born at delivery? | Fresh  Macerated | 1  0 | |  |
|  | Any gross anomaly? | Yes  No | 1  0 | |  |
|  | Which one? | Hydrocephalus  Anencephaly  Cleft lip and palate | 1  2  3 | |  |
|  | What was the APGAR @ 1st mint? | … |  | |  |
|  | Apgar at 5th minute? |  |  | |  |
|  | What was the weight? | …. |  | |  |
|  | NICU admitted? | Yes  No | 1  0 | |  |
|  | Reason for admission? | Asphyxia  RDS  Sepsis  Prematurity  Low birth weight  Others | 1  2  3  4  5  6 | |  |
